# Supplementary material
Source: Elsevier journal article supplement (https://www.sciencedirect.com/science/article/pii/S0187451914001048)
Supplement: mmc1 [file S0187451914001048:mmc1.pdf]

## Índice de Katz de independencia en las actividades de la vida diaria.

| Actividad                                    | Independiente                                                                                                                      | Dependiente                                                                                                   |
|----------------------------------------------|------------------------------------------------------------------------------------------------------------------------------------|---------------------------------------------------------------------------------------------------------------|
| <b>Bañarse (con esponja, ducha o bañera)</b> | Necesita ayuda para lavarse una sola parte (como la espalda o una extremidad incapacitada) o se baña completamente sin ayuda.      | Necesita ayuda para lavarse más de una parte del cuerpo, para salir o entrar en la bañera, o no se lava solo. |
| Vestirse                                     | Coge la ropa solo, se la pone, se pone adornos y abrigos y usa cremalleras (se excluye el atarse los zapatos).                     | No se viste solo o permanece vestido parcialmente.                                                            |
| Uso del retrete                              | Accede al retrete, entra y sale de él, se limpia los órganos excretores y se arregla la ropa (puede usar o no soportes mecánicos). | Usa orinal o cuña o precisa ayuda para acceder al retrete y utilizarlo.                                       |
| Movilidad                                    | Entra y sale de la cama y se sienta y levanta de la silla solo (puede usar o no soportes mecánicos).                               | Precisa de ayuda para utilizar la cama y/o la silla; no realiza uno o más desplazamientos.                    |
| Continencia                                  | Control completo de micción y defecación.                                                                                          | Incontinencia urinaria o fecal parcial o total.                                                               |
| Alimentación                                 | Lleva la comida desde el plato o su equivalente a la boca (se excluyen cortar la carne y untar la mantequilla o similar)           | Precisa ayuda para la acción de alimentarse, o necesita de alimentación enteral o parenteral .                |

El resultado se informa mediante la letra adecuada:

| Índice de Katz | Interpretación                                                                                |
|----------------|-----------------------------------------------------------------------------------------------|
| A              | Independiente en alimentación, continencia, movilidad, uso del retrete, vestirse y bañarse.   |
| B              | Independiente para todas las funciones anteriores excepto una.                                |
| C              | Independiente para todas excepto bañarse y otra función adicional.                            |
| D              | Independiente para todas excepto bañarse, vestirse y otra función adicional.                  |
| E              | Independiente para todas excepto bañarse, vestirse, uso del retrete y otra función adicional. |
| F              | Independiente para todas excepto bañarse, vestirse, uso del retrete y otra función adicional. |
| G              | Dependiente en las seis funciones.                                                            |
| H              | Dependiente en al menos dos funciones, pero no clasificable como C, D,E o F.                  |

**Independiente** significa sin supervisión, dirección o ayuda personal activa, con las excepciones que se indican más abajo. Se basan en el estado actual y no en la capacidad de hacerlas. Se considera que un paciente que se niega a realizar una función no hace esa función, aunque se le considere capaz.
