# Supplementary material
Source: Elsevier journal article supplement (https://www.sciencedirect.com/science/article/pii/S0187451914001048)
Supplement: mmc2 [file S0187451914001048:mmc2.pdf]

## Índice de Función Visual VisQoL-15.

INSTRUCCIONES: Si Usted presenta problemas relacionados con su visión en las siguientes actividades, marque con una (x) si la respuesta es afirmativa, en sin problemas, pequeños problemas, grandes problemas y serios problemas.

Si el paciente no está seguro de cómo responder a una pregunta, por favor que conteste lo que le parezca más cierto.

| Preguntas                                                   | Sin Problemas | Pequeños Problemas | Grandes Problemas | Serios Problemas |
|-------------------------------------------------------------|---------------|--------------------|-------------------|------------------|
| 1.Leyendo libros o periódicos                               |               |                    |                   |                  |
| 2.Leyendo textos en la TV                                   |               |                    |                   |                  |
| 3.Viendo programas en la TV                                 |               |                    |                   |                  |
| 4.Leyendo o escribiendo cartas                              |               |                    |                   |                  |
| 5.Haciendo llamadas telefónicas                             |               |                    |                   |                  |
| 6.Usando el timbre de la puerta                             |               |                    |                   |                  |
| 7.Reconociendo caras                                        |               |                    |                   |                  |
| 8.Mirando fotos                                             |               |                    |                   |                  |
| 9.Haciendo Labores de Costura                               |               |                    |                   |                  |
| 10.Comprando                                                |               |                    |                   |                  |
| 11.Caminando                                                |               |                    |                   |                  |
| 12.Conduciendo autos                                        |               |                    |                   |                  |
| 13.Conduciendo bicicletas                                   |               |                    |                   |                  |
| 14.Cocinando                                                |               |                    |                   |                  |
| 15.Lavando                                                  |               |                    |                   |                  |
| 16.Reconociendo flores                                      |               |                    |                   |                  |
| 17.Pescando                                                 |               |                    |                   |                  |
| 18.Tocando instrumentos                                     |               |                    |                   |                  |
| 19.Hobbits                                                  |               |                    |                   |                  |
| 20.Visión estimada por sí mismo en relación a sus problemas |               |                    |                   |                  |
